1 **Exploring facilitators for a transition from alternative and complementary**  
2 **therapies to evidence-based treatments in Ugandan first-episode psychosis**  
3 **patients.**

4 **Authors:** Emmanuel K. Mwesiga<sup>1, 2</sup>; Andrew S. Ssemata<sup>2</sup>, Ann Jacqueline  
5 Nakitende<sup>2</sup>, Linnet Ongeri<sup>3</sup>; Aggrey Semeere<sup>4</sup>; Rachel Loewy<sup>5</sup>; Susan Meffert<sup>5</sup>;  
6 Noeline Nakasujja<sup>2</sup>.

7 **Affiliations:**

- 8 1. UCGHI GloCal Global Health Fellow at the Infectious Diseases Institute.  
9 2. Department of Psychiatry, College of Health Sciences, Makerere University.  
10 3. Centre for Clinical Research, Kenya Medical Research Institute.  
11 4. Infectious Diseases Institute, Makerere University.  
12 5. Department of Psychiatry, University of California, San Francisco.

13 **Author emails:**

14 Dr Emmanuel K. Mwesiga, MBChB, MMED, PhD; UCGHI GloCal Global Health  
15 Fellow at the Infectious Diseases Institute [emmanuel.mwesiga@mak.ac.ug](mailto:emmanuel.mwesiga@mak.ac.ug)

16 Mr Andrew S. Ssemata, MSc; Department of Psychiatry, Makerere University  
17 [andrewssemata@yahoo.co.uk](mailto:andrewssemata@yahoo.co.uk)

18 Ms Ann Jacqueline Nakitende MSc; Department of Psychiatry, Makerere University  
19 [janakitex@yahoo.com](mailto:janakitex@yahoo.com)

20 Dr Linnet Ongeri MBChB; MMED (Psych), Kenya Medical Research Institute;  
21 [linongeri@gmail.com](mailto:linongeri@gmail.com)

22 Dr Aggrey Semeere MBChB, MMED, MAS; Infectious Diseases Institute, Makerere  
23 University. [asemeere@gmail.com](mailto:asemeere@gmail.com)

24 Dr Rachel Loewy PhD; Professor, Department of Psychiatry, University of California,  
25 San Francisco. [Rachel.Loewy@ucsf.edu](mailto:Rachel.Loewy@ucsf.edu)

26 Dr Susan Meffert MD, MPH, Associate Professor, Department of Psychiatry,  
27 University of California, San Francisco. [Susan.Meffert@ucsf.edu](mailto:Susan.Meffert@ucsf.edu)

28 Prof. Noeline Nakasujja MBChB, MMED, PhD; Department of Psychiatry, Makerere  
29 University [drnoeline@yahoo.com](mailto:drnoeline@yahoo.com)

30 **Corresponding Author:**

31 Dr. Emmanuel Kiiza Mwesiga,  
32 Department of Psychiatry,  
33 College of Health Sciences, Makerere University  
34 Uganda

35 **Email:** [emmanuel.mwesiga@mak.ac.ug](mailto:emmanuel.mwesiga@mak.ac.ug)

36 **Keywords:** First episode psychosis, evidence-based treatments, alternative and  
37 complementary therapies. Duration of untreated psychosis, low-income country.

38

39 **Abstract**

40 **Introduction:** Most patients with psychotic disorders in Africa initially use alternative  
41 and complementary therapies leading to delays accessing evidence-based  
42 treatments. This delay, known as the duration of untreated psychosis (DUP), is  
43 associated with suboptimal response and reduced efficacy in short-term and long-  
44 term outcomes. In this study, we explore facilitators for transitioning from alternative  
45 and complementary therapies to evidence-based treatments for psychotic disorders,  
46 comparing these facilitators between patients and their caregivers.

47

48 **Methods:** The study was conducted at Butabika hospital in Kampala, Uganda.  
49 Participants included patients with first-episode psychosis who had used alternative  
50 and complementary therapies and their caregivers. An exploratory qualitative design  
51 using in-depth interviews was performed with thematic analysis used to analyze the  
52 data.

53

54 **Results:** We interviewed eight patients and eight caregivers. The key themes that  
55 led to a switch were the high cost of alternative therapies, a desire to know the cause  
56 of the illness, seeking better care and the influence of friends and community  
57 members. Themes were similar among the participants and their caregivers except  
58 for stigma, which was only found among the caregivers.

59

60 **Conclusions:** The reasons for transitioning from alternative and complementary  
61 therapies to evidence-based treatments are similar between patients and caregivers,  
62 except for stigma that is a more important factor for transition among caregivers.  
63 Since this was an exploratory study, additional research with a larger sample and  
64 more diverse population would enable a deeper understanding of these factors and  
65 guide the development of interventions to reduce DUP and improve outcomes for  
66 psychotic disorders.

67

68

69

70

71

## 72 **Introduction**

73 More than half of the patients with a psychotic disorder in Africa initially use  
74 alternative and complementary therapy (ACT) as their first treatment before  
75 switching to evidence-based treatments (1-3). A more significant proportion of  
76 patients with psychotic disorders use ACT than other disorders like HIV/AIDS (4).  
77 ACT involves the use of non-conventional approaches as a means of treatment (5).  
78 For psychotic disorders, these may include religious healers, religious rituals,  
79 herbalists and traditional healers (2, 6, 7). Preference for alternative therapies is  
80 premised on spiritual attributions as the cause of a psychotic illness (8). This differs  
81 from evidence-based treatments (EBTs) like antipsychotic medication, psychological  
82 and social interventions premised on a biopsychosocial model of illness (9-13).

83 The use of alternative and complementary therapies and delays in initiation of  
84 evidence-based treatments like antipsychotic medication is associated with  
85 prolonged duration of untreated psychosis (DUP) (8, 14). In Sub-Saharan Africa  
86 (SSA), psychosis patients have a mean DUP of up to five years, compared to one  
87 year in high-income countries (HICs) (15, 16). Shorter DUP like that seen in HICs is  
88 associated with lower symptom severity, higher cognitive functioning, decreased  
89 substance use and less disability (15-17). Furthermore, the WHO has recommended  
90 a target DUP of 90 days(18). The first step toward reducing DUP in this population is  
91 understanding why patients with psychosis and their families switch to evidence-  
92 based treatments after initially using ACT.

93 Most literature on alternative and complementary therapy use in patients with  
94 psychotic disorders has not explored the reasons for transitioning to evidence-based  
95 treatments. Approximately 35% of patients using ACT transition to EBTs (19). These  
96 patients' initial presentation to hospitals for EBTs is characterized by severe illness  
97 presentations (1). However, the reasons for the transition from ACT to EBTs are  
98 unclear (1, 19, 20). It is also unclear if the reasons for the transition are similar  
99 between patients and caregivers. This knowledge is essential for services providing  
100 evidence-based treatments to improve future engagements (21).

101 This study aimed to explore the reasons for the transition from alternative and  
102 complementary therapy to evidence-based treatments in patients with psychotic

103 disorders from Uganda. Specifically, we wanted to understand the reasons for the  
104 switch; and if these reasons differ among patients and caregivers.

## 105 **Methods**

106 **Setting:** The study was conducted at Butabika National Psychiatric Referral and  
107 Teaching hospital of Uganda (BNPRTH). The setting has been described previously  
108 (22). Briefly, it is a 200-bed hospital that serves as the leading tertiary psychiatric  
109 institution. The selection of BNPRTH was informed by the desire to access  
110 individuals from different backgrounds. It has a wide catchment area of patients  
111 from all regions in the country, which improved the applicability of study findings  
112 across various backgrounds.

113 **Study design:** This was an exploratory qualitative study design that used in-depth  
114 interviews (IDIs) guided by a semi-structured interview guide to explore motivations  
115 for transitioning from ACT to evidence-based treatments in patients with psychotic  
116 disorders. IDIs were considered appropriate for generating data on personal, lived  
117 experiences among the caregivers and patients and thematic analysis.

118 **Sample:** The participants were already enrolled in a study on cognition at the first  
119 episode of psychosis (FEP) (19). The participants in the previous study had provided  
120 informed consent and permission to be contacted for future studies. They were  
121 invited to participate in the study if they could speak English or Luganda, had used  
122 ACT before attending the hospital and were able to come along with a caregiver. The  
123 caregiver was someone who had actively been involved in the care of the patient.  
124 Individuals were purposively selected and recruited until a point of saturation (no  
125 new information emerged from the collected data) was reached.

126 **Data collection:** The study was conducted from a quiet and conducive facility at  
127 BNPRTH between April and September 2019 among 16 individuals (eight patients  
128 and eight caregivers). The research nurse invited potentially eligible patients and  
129 caregivers to participate in the in-depth interviews conducted by two authors (ASS  
130 and AJN). The interviewers obtained informed consent and conducted in-depth  
131 interviews for each patient and their caregiver separately. In-depth interviews were  
132 conducted in English or Luganda (a local dialect), using a semi-structured interview  
133 guide with open-ended questions and probes lasting 45-70 minutes. The interviews  
134 were audio-recorded with consent from the participants and later transcribed

135 verbatim alongside detailed hand-written notes by the interviewer to supplement the  
136 audio data. Three in-depth interviews (patients n=2, caregiver n=1) conducted in  
137 Luganda were translated into English.

138 **Data analysis:** We employed thematic analysis and developed a matrix scheme to  
139 interpret patterns of meaning from a rich and detailed yet complex account of data  
140 corpus as advanced by Braun and Clarke (2006) (23). The six steps followed  
141 included familiarization, coding, generating themes, reviewing themes, defining and  
142 naming themes, and writing up. Interview transcripts were reviewed alongside the  
143 audio recordings and interview notes to check for accuracy and enable  
144 familiarization of the data by the two authors (ASS, AJN). The first author (EKM) was  
145 an independent reviewer as he was not involved in the data collection process. The  
146 initial two transcripts from each participant category were read several times by two  
147 authors (ASS and AJN) independently through a process of open coding until no  
148 new issues were identified. After reaching an agreement on the selected codes,  
149 these were organized into categories and sub-categories to develop a codebook with  
150 main and sub-themes. Any new ideas identified from subsequent transcripts were  
151 coded and included in the codebook and discrepancies were discussed and resolved  
152 by involving the third reviewer (EKM). The codebook was reviewed by the first author  
153 (EKM) to ensure completeness of data retrieval, then later used to analyze the  
154 remaining transcripts and the codebook by two other authors (ASS and AJN). The  
155 data collection process continued upon completion of coding and analysis of the  
156 previously collected interviews to ensure we collected sufficient information to  
157 address the research question until saturation. Saturation was attained when most of  
158 the themes emerged, and no new information arose (24). Relevant excerpts were  
159 identified and are reported in the findings section to illustrate and represent the  
160 participants' views.

## 161 **Findings**

162 We obtained data saturation after interviewing 16 participants (8 patients and 8  
163 caregivers). The median age of the patients was 28 years (IQR 22-34), while the  
164 median age of the caregivers was 39.5years (IQR 31-45.5). The patients comprised  
165 four females and four males, while the caregivers were three females and five males.  
166 Caregivers included two spouses, two parents, one sibling, one close friend and two

167 aunt/uncles. One caregiver had previously suffered from a psychotic disorder, and  
 168 6/8 caregivers were currently employed. The themes from the participant interviews  
 169 are summarized in Table 1.

170 *Table 1: Summary of themes and sub-themes observed in the interviews.*

|    | Theme                                                               | Sub-themes                                                                                 |
|----|---------------------------------------------------------------------|--------------------------------------------------------------------------------------------|
| 1. | <b>Dissatisfaction with ACT</b>                                     | <i>a) Significant and worsening mental symptoms</i>                                        |
|    |                                                                     | <i>b) Ineffectiveness of the alternative treatment</i>                                     |
|    |                                                                     | <i>c) Multiple demands and cost of alternative and complementary therapy</i>               |
| 2. | <b>Desire to know the cause of the illness and seek better care</b> | <i>a) Desperation in seeking the cause of illness</i>                                      |
|    |                                                                     | <i>b) Desire for a cure and better medical treatment.</i>                                  |
|    |                                                                     | <i>c) Knowledge of where to seek evidence-based treatments</i>                             |
| 3. | <b>Influence of friends/community members</b>                       | <i>a) Exposure to lived positive experience of Western medical treatment from Butabika</i> |
|    |                                                                     | <i>b) Receiving recommendations and referral</i>                                           |
|    |                                                                     | <i>c) Avoiding stigma from the community</i>                                               |

171

172 **1. DISSATISFACTION WITH ACT**

173 **a. Multiple demands and cost of ACT.**

174 The notion ‘no money, no care’ resonated strongly with majority of the participants  
 175 and caregivers who sought ACT care before switching to evidence-based  
 176 treatments.

177 *“When they used to take me there [mentions location of a traditional healer], they*  
 178 *used to ask us a lot of things like goats, chicken, money, clothes and they could*  
 179 *tell us that I was attacked by a small goddess called Nakayima who needed to*  
 180 *dress up in a gomesi [female traditional attire] every time we went there. It was*  
 181 *so expensive as they demanded for two gomesi and things like chicken. After a*  
 182 *while I realized that our money was being wasted and you could not get any*

183 *service without meeting the demands... The good thing here in Butabika when*  
184 *medicines are available, it is free of charge." **female participant.***

185 *"When you look at the [mentions religious place] nowadays there are very many*  
186 *false service providers, someone will come out and say that he is going to help*  
187 *you but you first have to pay a large amount of money. They don't know how the*  
188 *sickness came about; the effects and then they say you are going to be well*  
189 *meanwhile they have 'eaten' [taken] my money. Time reached when I didn't*  
190 *have money and he was not improving so I decided to come to the professional*  
191 *people". **male caregiver.***

## 192 **b. Ineffectiveness of ACT**

193 Participants decided to try out evidence-based treatments on finding ACT was  
194 ineffective and failed to resolve the condition.

195 *"The challenge we faced that made us come here for care was that we were*  
196 *given some things [herbs and charms from a traditional healer] to help as you*  
197 *know our things [using African traditional healers] but the condition failed to*  
198 *improve and she actually kept getting worse. We decided those things are not*  
199 *working, let's try the medical doctors." **female caregiver.***

200 *"They took me to some witches, and they told me to take some herbs for*  
201 *some time. They were forcing me to take herbs all the time, but I never saw*  
202 *any improvement. So, when they [caregivers] saw that all was not working*  
203 *they just ended bringing me here to Butabika after spending lots of money."*  
204 ***male participant***

## 205 **c. Delayed identification as mental illness**

206 Initially participants had not classified their symptoms as mental illnesses and only  
207 resorted to evidence-based treatments when symptoms did not improve.

208 *"Before it had started, we did not come here we went to only church. The next*  
209 *option was to bring him to Butabika that is where they rehabilitate mental*  
210 *disorders, and whatever will come from Butabika it's what we shall go with"*  
211 ***Female caregiver.***



212 *"Ok, the change they saw in me made them think I was 'mental'. They started*  
213 *thinking that I was going to get mad because I had totally changed, and I*  
214 *would not sleep. I lost appetite, and I would not eat, but I would just be*  
215 *there...I would drink sodas, Splash [packed fruit juice], water, but I would not*  
216 *eat. So those are some of the things that prompted them to think that I had*  
217 *got a mental disorder because they used to see that I was disorganizing the*  
218 *property at home so they decided to bring me here [Butabika hospital].*  
219 *Actually, that night before bringing me here my relative wanted to get a rope*  
220 *and tie me up."* **female participant.**

## 221 **2. DESIRE TO KNOW THE CAUSE OF THE ILLNESS AND SEEK BETTER CARE**

222 Participants expressed a desire to know the cause of illness and better ways to  
223 manage the symptoms.

### 224 **a. Desperation in seeking the cause of illness.**

225 Participants also noted that they were desperate to seek answers, especially to  
226 understand the cause of the patient's illness.

227 *"I think after trying all these things, they were tired and needed a solution, so*  
228 *this time they took me to the hospital and I was given some treatment. They*  
229 *wanted to find out what is exactly was disturbing me. We all could not*  
230 *understand it and no one where we had been could explain. So they brought*  
231 *me here."* **female participant.**

232 *"But what forced me to bring my child here is I really wanted to see that if his*  
233 *head is normal or there's something that is not right on his head. When he*  
234 *had that problem before and he was prayed for, the situation normalized. This*  
235 *time I told them [the people who were praying] lets first take him to hospital*  
236 *and examine him to see what disturbs this child. If the situation fails, there*  
237 *also will give us a way forward".* **female caregiver**

### 238 **b. Desire for a cure and better medical treatment.**

239 Both patients and caregivers reported that the desire for better and quicker treatment  
240 to resolve the mental condition was another reason for transitioning to evidence-  
241 based treatments.

242 *"I was eventually brought here because I wanted to be healthy with nothing*  
243 *disturbing my head. The drugs here treat the mental problem, and I think*  
244 *when I stop taking them, I will experience a mental disorder... This medicine*  
245 *is to refresh the brain and also to cure the wounds inside." **male participant.***

246 *"Personally, I believe that I can pray alone, and God listens to my prayers. But*  
247 *I brought her to the hospital because this is the most skilled hospital in*  
248 *Uganda while at the same time I prayed so that we were not praying only so*  
249 *that God can use the doctors to treat her, maybe get a cure and also make*  
250 *miracles happen again just like those who use herbs and African magic*  
251 *[witchcraft]" **male caregiver***

### 252 **3. INFLUENCE OF FRIENDS/COMMUNITY MEMBERS**

253 Family or friends were essential in ensuring that patients and their caregivers sought  
254 care and influenced the transition to evidence-based treatments in various ways.

#### 255 **a. Lived positive experience of Western medical treatment from a mental** 256 **health facility**

257 Previous patients and caregivers with lived experiences about using evidence-based  
258 treatment and services at the National Mental Health referral hospital were crucial in  
259 convincing patients to switch to evidence-based treatments.

260 *"At the church where they used to take me for prayers, there was a pastor*  
261 *who told my parents to bring me here because he also had suffered a mental*  
262 *issue 13 years ago, he was treated from Butabika hospital and he was proud*  
263 *of it." **male participant***

264 *"My father's friend knew I have got a problem with my head, he told them and*  
265 *convinced them that she doesn't need to be taken to the traditional healers or*  
266 *to the church and she is prayed for any more but we have to take her to*  
267 *Butabika because that's where we can get the doctor and proper treatment*  
268 *that is why they brought me here. I did not need to be taken back to the*  
269 *traditional doctor or to the church but they had to bring me here in Butabika".*  
270 **female participant.**

271 *"I am used of taking people to hospital because I am a policer officer and I*  
272 *always take those people. So, my option when it comes to the persons who is*  
273 *closer to me and they have issues similar to those we always bring here, that*  
274 *was the only option I had left because we had tried all the other things" **male***  
275 ***caregiver.***

#### 276 **b. Fear of stigma associated with illness.**

277 In other cases where ACT was not effective, participants had to move from one  
278 service provider to another to pursue a lasting solution—however, this movement  
279 from one service provider to another triggered stigma in the community.

280 *"When everything [ACT] failed, I realized that am going to be a laughingstock*  
281 *in the community because my relative had started to move around naked in*  
282 *the community, and I knew that it will make me feel bad. What I did I went to*  
283 *the LC (\*LC is a short form of local council which is the smallest administrative*  
284 *unit in Uganda) and they wrote for me a letter and I went to the police. The*  
285 *police told me to pay their fuel to take her to Butabika hospital." **male***  
286 ***caregiver.***

287 *"...because in the community where we stay, everyone speculates. Some say*  
288 *that it is witchcraft others it is spiritual. One suggests a witch doctor another*  
289 *suggests a different traditional healer. You try many options so you end up in*  
290 *many places and feel you are stigmatized, even in the church they pray for*  
291 *you when everyone is seeing you so you feel ashamed. Butabika was a better*  
292 *option and you are assured because it's where the experts are and people*  
293 *there are in similar circumstances." **female caregiver***

#### 294 **Discussion**

295 Our main findings were that the reasons for a switch from alternative and  
296 complementary therapy to evidence-based treatments were similar among FEP  
297 patients and their caregivers apart from societal stigma, which was a key reason for  
298 switching in only caregivers.

299 **Catastrophic expenditures as a reason for the switch to evidence-based**  
300 **treatments:** Patients with psychotic disorders switched to EBTs due to the cost of  
301 ACT. There were no free "public" ACT therapies like at government hospitals.

302 Patients were willing to pay for services if there were positive results and a  
303 transparent payment structure. As government financing is often limited for mental  
304 health services in low resource settings (25-27), the acceptability of cost-sharing  
305 needs review as families may accept payment as long as there are good outcomes  
306 (28). As affordable and accessible treatment contributes to proper care and timely  
307 resolution of symptoms, the need for mental health insurance may be helpful.  
308 Uganda has no government health insurance policy, and private insurance policies  
309 sometimes exclude mental health services (29). Since a national insurance health  
310 policy is soon to be rolled out, mental health services must not be excluded as  
311 patients may not be able or willing to pay for long term care. The role of community-  
312 based health insurance needs review (29, 30).

313 **Poor treatment outcomes as a reason for a switch:** Patients reported insufficient  
314 improvement of the illness while using ACT. This is in keeping with previous  
315 literature highlighting the inadequate response to treatment in patients treated with  
316 ACT in Uganda (1, 31). It is recommended that patients with psychotic disorders be  
317 treated with antipsychotic medication early in the illness at the first episode of  
318 psychosis (21, 32, 33). These delays in initiating care are drivers for long durations  
319 of untreated psychosis and corresponding poor long term outcomes. Studies are  
320 greatly needed on interventions to reduce the DUP in patients using ACT.

321 **Societal support and stigma driving change to Western medicine:** In many  
322 cases, the recommendation to switch to EBTs were provided after ACT had been  
323 tried and failed. ACT for psychosis treatment is less stigmatized than EBTs, as  
324 described in previous literature in the same setting (2, 6). In many cases, the  
325 community was a crucial driver in referrals to Butabika hospital for EBTs. Friends,  
326 family, former patients with lived experiences and non-mental health workers were  
327 drivers of switching to evidence-based treatments. Caregivers only accepted the  
328 need to try evidence-based treatments to avoid the stigma associated with failure to  
329 recover with ACT. It may explain why although many patients in this setting used  
330 ACT, only the severe patients are reviewed in hospitals (19, 34). At a population  
331 level, interventions destigmatizing EBTs for psychotic disorders may be accepted by  
332 communities. There is a need to educate the public that evidence-based treatments  
333 do not need to be after failed attempts with ACT. Community acceptance and  
334 support of evidence-based treatments is a crucial opportunity to reducing DUP.

335 **Need to understand the illness as a reason for a switch:** It has been suggested  
336 that ACT is much better at explaining cultural idioms of distress (2). We did not find  
337 evidence to support this theory and found that patients and caregivers switched to  
338 evidence-based treatments after ACT failed to explain the causes of the illness.  
339 There is a need to simplify the theories surrounding psychosis and include it as part  
340 of psychosocial management for psychotic disorders in this setting.

341 **Limitations:** The study cannot explain why some participants use ACT only and do  
342 not switch to evidence-based treatments or if, after using evidence-based  
343 treatments, patients switch back to ACT. These are all critical findings to reduce  
344 DUP. As our sample was purposefully selected to include patients who had  
345 switched, further studies are required.

346 **Conclusion:** The study showed that for many patients and caregivers, ACT is the  
347 initial treatment of choice for patients with psychotic disorders and their caregivers  
348 even in the presence of evidence-based treatment. Further studies on collaboration  
349 between evidenced-based treatment providers and ACT providers are recommended  
350 to ensure earlier initiation of antipsychotic medication which has vast implications for  
351 reducing the duration of untreated psychosis and patient outcomes for psychotic  
352 disorders. As many patients and caregivers may opt for ACT as their first treatment  
353 choice, it is also essential to better understand ACT to further these collaborations in  
354 the management of psychotic disorders This could be in the form of building better  
355 networks with ACT providers or joint education or awareness programs (2). There is  
356 a need for even greater access to mental health treatment to address delay in  
357 treatment for FEP. Provision of accessible good quality atypical antipsychotic  
358 medication with fewer side effects is recommended as patients are eager to use  
359 cheap and effective services.

360 **Ethical considerations:** These have been previously described (22). Briefly, ethical  
361 approval was received from ethics committees at the school of medicine research  
362 and ethics committee of the college of health sciences at Makerere University (#REC  
363 REF 2017–153) as well as the Uganda National Council of Science and Technology  
364 (HS237ES). Informed consent was obtained from all study participants before  
365 enrollment and signed consent forms are available. Participants and caregivers were  
366 each reimbursed \$6 (approximately sh20 000) for their time, either on completion of

367 the full study assessment or when consent was withdrawn. No individual participant  
368 data has been reported.

369 **Competing interests:** The authors declare no conflict of interest.

370 **Author contributions:** EKM conceptualised the research idea. EKM, RL, NN, LO,  
371 AS and SM were responsible for determining the content and scope of the study.  
372 EKM, LO, AS and SM were responsible for determining the design and methods of  
373 the study. NN and RL were responsible for determining the study tools and were  
374 content experts. ASS and AJN performed the in-depth interviews and data analysis.  
375 All authors were also involved in writing this protocol and accepted the final version.

376 **Funding:** This project is supported by the Fogarty International Centre (FIC) and the  
377 National Institutes of Mental Health of the National Institute of Health (NIH) under  
378 award number D43TW009343 and the University of California Global Health Institute  
379 (UCGHI). The consent is solely the responsibility of the authors and does not  
380 necessarily represent the official views of the NHI or UCGHI.

381 **Data availability:** The codebook analyzed during the current study is available from  
382 the corresponding author.

383

## 384 References

- 385 1. Abbo C, Ekblad S, Waako P, Okello E, Musisi S. The prevalence and severity of mental  
386 illnesses handled by traditional healers in two districts in Uganda. *Afr Health Sci.* 2009;1(9):S16-22.
- 387 2. Abbo C, Odokonyero R, Ovuga E. A narrative analysis of the link between modern medicine  
388 and traditional medicine in Africa: a case of mental health in Uganda. *Brain research bulletin.* 2018.
- 389 3. Burns JK, Tomita A. Traditional and religious healers in the pathway to care for people with  
390 mental disorders in Africa: a systematic review and meta-analysis. *Soc Psychiatry Psychiatr  
391 Epidemiol.* 2015;50(6):867-77.
- 392 4. Peltzer K, Preez NF-d, Ramlagan S, Fomundam H. Use of traditional complementary and  
393 alternative medicine for HIV patients in KwaZulu-Natal, South Africa. *BMC Public Health.*  
394 2008;8(1):255.
- 395 5. Aziato L, Antwi HO. Facilitators and barriers of herbal medicine use in Accra, Ghana: an  
396 inductive exploratory study. *BMC complementary and alternative medicine.* 2016;16:142.
- 397 6. Abbo C. Profiles and outcome of traditional healing practices for severe mental illnesses in  
398 two districts of Eastern Uganda. *Glob Health Action.* 2011;4:4-7117.
- 399 7. Sarris J. Herbal medicines in the treatment of psychiatric disorders: 10-year updated review.  
400 *Phytotherapy research : PTR.* 2018;32(7):1147-62.
- 401 8. Burns JK, Jhazbhay K, Kidd M, Emsley RA. Causal attributions, pathway to care and clinical  
402 features of first-episode psychosis: a South African perspective. *Int J Soc Psychiatry.* 2011;57(5):538-  
403 45.
- 404 9. Arciniegas DB. Psychosis. *Continuum (Minneapolis, Minn).* 2015;21(3 Behavioral Neurology  
405 and Neuropsychiatry):715-36.
- 406 10. McFarlane WR. Family Interventions for Schizophrenia and the Psychoses: A Review. *Family  
407 process.* 2016;55(3):460-82.
- 408 11. Moritz S, Klein JP, Lysaker PH, Mehl S. Metacognitive and cognitive-behavioral interventions  
409 for psychosis: new developments □ Dialogues Clin Neurosci. 2019;21(3):309-17.
- 410 12. Veerman SRT, Schulte PFJ, de Haan L. Treatment for Negative Symptoms in Schizophrenia: A  
411 Comprehensive Review. *Drugs.* 2017;77(13):1423-59.
- 412 13. Stafford MR, Mayo-Wilson E, Loucas CE, James A, Hollis C, Birchwood M, et al. Efficacy and  
413 safety of pharmacological and psychological interventions for the treatment of psychosis and  
414 schizophrenia in children, adolescents and young adults: a systematic review and meta-analysis.  
415 *PLoS One.* 2015;10(2):e0117166.
- 416 14. Birchwood M, Connor C, Lester H, Patterson P, Freemantle N, Marshall M, et al. Reducing  
417 duration of untreated psychosis: care pathways to early intervention in psychosis services. *The  
418 British Journal of Psychiatry.* 2013;203(1):58-64.
- 419 15. Chiliza B, Asmal L Fau - Emsley R, Emsley R. Early intervention in schizophrenia in developing  
420 countries: focus on duration of untreated psychosis and remission as a treatment goal. (1369-1627  
421 (Electronic)).
- 422 16. Farooq S, Large M Fau - Nielssen O, Nielssen O Fau - Waheed W, Waheed W. The  
423 relationship between the duration of untreated psychosis and outcome in low-and-middle income  
424 countries: a systematic review and meta analysis. 2009(0920-9964 (Print)).
- 425 17. Diana O. Perkins, Hongbin Gu, Kalina Boteva, Jeffrey A. Lieberman. Relationship Between  
426 Duration of Untreated Psychosis and Outcome in First-Episode Schizophrenia: A Critical Review and  
427 Meta-Analysis. *American Journal of Psychiatry.* 2005;162(10):1785-804.
- 428 18. Bertolote J, McGorry P. Early intervention and recovery for young people with early  
429 psychosis: consensus statement. *The British Journal of Psychiatry.* 2005;187(S48):s116-s9.
- 430 19. Mwesiga EK, Nakasujja N, Nakku J, Nanyonga A, Gumikiriza JL, Bangirana P, et al. One year  
431 prevalence of psychotic disorders among first treatment contact patients at the National Psychiatric  
432 Referral and Teaching Hospital in Uganda. *PLoS one.* 2020;15(1):e0218843-e.

- 433 20. Mwesiga EK, Akena D, Koen N, Nakku J, Nakasujja N, Stein DJ. Comparison of antipsychotic  
434 naïve first-episode psychosis patients and healthy controls in Uganda. *Early Interv Psychiatry*. 2021.
- 435 21. Lieberman JA, Small SA, Girgis RR. Early Detection and Preventive Intervention in  
436 Schizophrenia: From Fantasy to Reality. *The American journal of psychiatry*. 2019;176(10):794-810.
- 437 22. Mwesiga EK, Nakasujja N, Onger L, Semeere A, Loewy R, Meffert S. A cross-sectional mixed  
438 methods protocol to describe correlates and explanations for a long duration of untreated psychosis  
439 among patients with first episode psychosis in Uganda. *BMJ open*. 2019;9(7):e028029.
- 440 23. Braun V, Clarke V. Using thematic analysis in psychology. *Qualitative research in psychology*.  
441 2006;3(2):77-101.
- 442 24. Saunders B, Sim J, Kingstone T, Baker S, Waterfield J, Bartlam B, et al. Saturation in  
443 qualitative research: exploring its conceptualization and operationalization. *Quality & quantity*.  
444 2018;52(4):1893-907.
- 445 25. Ssebunnya J, Kangere S, Mugisha J, Docrat S, Chisholm D, Lund C, et al. Potential strategies  
446 for sustainably financing mental health care in Uganda. *International journal of mental health*  
447 *systems*. 2018;12:74-.
- 448 26. Petersen I, Marais D, Abdulmalik J, Ahuja S, Alem A, Chisholm D, et al. Strengthening mental  
449 health system governance in six low- and middle-income countries in Africa and South Asia:  
450 challenges, needs and potential strategies. *Health policy and planning*. 2017;32(5):699-709.
- 451 27. Zikusooka CM, Kyomuhang R, Orem JN, Tumwine M. Is health care financing in Uganda  
452 equitable? *Afr Health Sci*. 2009;9 Suppl 2(Suppl 2):S52-8.
- 453 28. James CD, Hanson K, McPake B, Balabanova D, Gwatkin D, Hopwood I, et al. To retain or  
454 remove user fees?: reflections on the current debate in low- and middle-income countries. *Appl*  
455 *Health Econ Health Policy*. 2006;5(3):137-53.
- 456 29. Kakama AA, Namyalo PK, Basaza RK. Feasibility and desirability of scaling up Community-  
457 based Health Insurance (CBHI) in rural communities in Uganda: lessons from Kisiizi Hospital CBHI  
458 scheme. *BMC health services research*. 2020;20(1):662.
- 459 30. Dror DM, Hossain SA, Majumdar A, Pérez Koehlmoos TL, John D, Panda PK. What Factors  
460 Affect Voluntary Uptake of Community-Based Health Insurance Schemes in Low- and Middle-Income  
461 Countries? A Systematic Review and Meta-Analysis. *PLoS One*. 2016;11(8):e0160479.
- 462 31. Abbo C, Okello ES, Musisi S, Waako P, Ekblad S. Naturalistic outcome of treatment of  
463 psychosis by traditional healers in Jinja and Iganga districts, Eastern Uganda - a 3- and 6 months  
464 follow up. *Int J Ment Health Syst*. 2012;6(1):1752-4458.
- 465 32. Albert N, Weibell MA. The outcome of early intervention in first episode psychosis. *Int Rev*  
466 *Psychiatry*. 2019;31(5-6):413-24.
- 467 33. Marshall M, Rathbone J. Early intervention for psychosis. *Cochrane Database Syst Rev*.  
468 2011;15(6).
- 469 34. Abbo C, Ekblad S, Waako P, Okello E, Musisi S. The prevalence and severity of mental  
470 illnesses handled by traditional healers in two districts in Uganda. *Afr Health Sci*. 2009;9 Suppl 1:S16-  
471 22.

472
